# Supplementary material for: Seeing Radiology Curricula Through Turkish Medical Students’ Eyes: A Survey of Turkish Medical Schools’ Radiology Education
Source: Research Square preprint supplement (doi:10.21203/rs.3.rs-1554441/v1), 2022-05-06
Supplement: Supplementary file 1 [file a06383c2f289f4d34810e587.xlsx]

## Sheet: Question 1
Seeing Radiology Curricula Through Turkish Medical Students’ Eyes - A Survey of Turkish Medical Schools’ Radiology Education
What is your gender?
Answer Choices	Responses
Male	0.3856	381
Female	0.6073	600
Prefer not to answer	0.0071	7
	Answered	988
	Skipped	0

## Sheet: Question 2
Medical Student Assessment of Radiology Curriculum in Turkey Medical Schools
What are your future career plans?
Answer Choices	Responses
Clinician in medical field	0.3107	307
Clinician in surgical field	0.2925	289
Radiology	0.0466	46
Undecided	0.3502	346
	Answered	988
	Skipped	0

## Sheet: Question 3
Medical Student Assessment of Radiology Curriculum in Turkey Medical Schools
What year of medical school are you currently in?
Answer Choices	Responses
1st year medical student	0.2075	205
2nd year medical student	0.2085	206
3rd year medical student	0.1528	151
4th year medical student	0.2014	199
5th year medical student	0.1356	134
6th year medical student	0.0911	90
Other (please specify)	0.003	3
	Answered	988
	Skipped	0

## Sheet: Question 4
Medical Student Assessment of Radiology Curriculum in Turkey Medical Schools
Describe your clinical radiology training as a medical student.
Answer Choices	Responses
Required rotation	0.2439	241
Elective	0.0536	53
No training	0.1417	140
Unsure	0.1002	99
Have not entered clinical training	0.4605	455
	Answered	988
	Skipped	0

## Sheet: Question 5
Medical Student Assessment of Radiology Curriculum in Turkey Medical Schools
Did your preclinical exams include radiology imaging?
Answer Choices	Responses
Yes	0.586	579
No	0.414	409
	Answered	988
	Skipped	0

## Sheet: Question 6
Medical Student Assessment of Radiology Curriculum in Turkey Medical Schools
Who primarily taught your medical imaging during preclinical years?
Answer Choices	Responses
Radiologist	0.3563	352
Ph.D. professor	0.1903	188
M.D./D.O./MBBS professor (non-radiologist)	0.1174	116
Was not taught	0.1893	187
Not sure	0.1468	145
	Answered	988
	Skipped	0

## Sheet: Question 7
Medical Student Assessment of Radiology Curriculum in Turkey Medical Schools
How did your school teach you medical imaging? (Select all that apply)
Answer Choices	Responses
Lectures for medical imaging	0.6538	646
Self-guided learning with images provided	0.1761	174
Problem based small group learning dedicated to medical imaging	0.2065	204
Image assessment during rounds	0.1852	183
Not taught	0.2257	223
	Answered	988
	Skipped	0

## Sheet: Question 8
Medical Student Assessment of Radiology Curriculum in Turkey Medical Schools
Are you familiar with the American College of Radiology (ACR) Appropriateness Criteria?
Answer Choices	Responses
Very familiar	0.0111	11
Somewhat familiar	0.0658	65
I've heard of it but not familiar	0.3502	346
Never heard of it	0.5729	566
	Answered	988
	Skipped	0

## Sheet: Question 9
Medical Student Assessment of Radiology Curriculum in Turkey Medical Schools
How often did you use the ACR Appropriateness Criteria on clinic rotations?
Answer Choices	Responses
Daily	0.004	4
A few times a week	0.0132	13
A few times a month	0.0344	34
A few times a year	0.0415	41
Never used it	0.6387	631
Not applicable	0.2682	265
	Answered	988
	Skipped	0

## Sheet: Question 10
Medical Student Assessment of Radiology Curriculum in Turkey Medical Schools
Does your school provide you resources to go through radiology images on your own?
Answer Choices	Responses
Yes	0.3138	310
No	0.165	163
Not sure	0.5213	515
	Answered	988
	Skipped	0

[truncated: 10 more sheets: Question 11, Question 12, Question 13, Question 14, Question 15, Question 16, Question 17, Question 18, Question 19, Question 20]
